# Supplementary material
Source: PubMed Central journal article supplement (PMC4178436)
Supplement: ASN.2013080895_ASN2013080895SupplementaryData.pdf [file ASN.2013080895_ASN2013080895SupplementaryData.pdf]

**Supplementary Materials**

**Table S1. Individual characteristics of 50 patients with the syndrome of inappropriate antidiuresis.**

|                                                   | Pat. #    | Presumed cause of SIAD | Age [yr] | S-Na+ [mmol/l] | S-Osm [mOsm/kg] | U-Osm [mOsm/kg] | U-Na+ [mmol/l] | S-UA [mg/dL] | P-Copt. [pmol/l] | P-AVP [pmol/l] | DIU [L/T/-] | Spec. Treatment/Chemotherapy |
|---------------------------------------------------|-----------|------------------------|----------|----------------|-----------------|-----------------|----------------|--------------|------------------|----------------|-------------|------------------------------|
| Ectopic Copeptin Excess ('Type A', 10%)           | 1         | SCLC                   | 74       | 122            | 255             | 698             | 92             | 4.1          | 228              | 5              | –           | Cisplatin, Etop.             |
|                                                   | 2         | SCLC                   | 74       | 113            | 248             | 676             | 160            | 2.9          | 251              | 5.6            | –           | Cisplatin, Etop.             |
|                                                   | 3         | NSCLC                  | 55       | 128            | 260             | 739             | 57             | 4.1          | 246              | 4.6            | –           | Cis., Gemcitabine            |
|                                                   | 4         | NSCLC                  | 70       | 129            | 264             | 712             | 58             | 3.8          | 188              | 2              | –           | Cis., Gemcitabine            |
|                                                   | 5         | Renal Carc.            | 48       | 122            | 260             | 558             | 137            | 3.1          | 22.3             | 3.0            | L           | MTX                          |
|                                                   |           | Mean (SD)              |          | 64 (5)         | 123 (3)         | 257 (3)         | 676 (31)       | 101 (3)      | 3.6 (1)          | 135 (118)      | 4.0 (2)     |                              |
| Shifted Osmotic Copeptin Response ('Type B', 14%) | 6         | AML                    | 66       | 128            | 260             | 339             | 57             | 4.1          | 12.4             | 3.0            | –           | Busulfan                     |
|                                                   | 7         | CLL, B-NHL             | 66       | 129            | 258             | 521             | 182            | 3.5          | 9.2              | 2.5            | –           | Flud., Cycloph, MTX          |
|                                                   | 8         | NSCLC                  | 53       | 126            | 265             | 558             | 178            | 2.1          | 6.2              | 2.4            | –           | Carbo., Docetaxel            |
|                                                   | 9         | Idiopathic             | 57       | 129            | 266             | 445             | 98             | 3.4          | 6.2              | 1.9            | –           | -                            |
|                                                   | 10        | AML                    | 76       | 125            | 260             | 333             | 128            | 3.2          | 9.7              | 1.2            | –           | Cytar., Clofarabin           |
|                                                   | 11        | SLE                    | 55       | 129            | 263             | 312             | 52             | 4            | 2.9              | 1.3            | –           | Decortin                     |
|                                                   | 12        | Renal Carc.            | 73       | 129            | 266             | 393             | 46             | 4.3          | 7.1              | 3.3            | –           | Sunitinib                    |
|                                                   | Mean (SD) |                        | 64 (3)   | 128 (1)        | 263 (1)         | 414 (37)        | 106 (22)       | 3.5 (0.3)    | 7.7 (3)          | 2.2 (0.8)      |             |                              |

|                                                                      | Pat. #       | Presumed cause of SIAD | Age [yr]  | S-Na+ [mmol/l] | S-Osm [mOsm/kg] | U-Osm [mOsm/kg] | U-Na+ [mmol/l] | S-UA [mg/dL] | P-Copt. [pmol/l] | P-AVP [pmol/l] | DIU [L/T/-]  | Spec. Treatment/Chemotherapy |
|----------------------------------------------------------------------|--------------|------------------------|-----------|----------------|-----------------|-----------------|----------------|--------------|------------------|----------------|--------------|------------------------------|
| <b>Plateau-like/ missing osmotic Copeptin Response (Type C, 44%)</b> | 13           | MM                     | 75        | 129            | 263             | 326             | 62.8           | 3.8          | 16.7             | 0.9            | T            | Cycloph, Doxob               |
|                                                                      | 14           | CML                    | 35        | 128            | 256             | 438             | 119.3          | 2.1          | 12.7             | 4.2            | -            | Imatinib                     |
|                                                                      | 15           | Esophageal Ca.         | 66        | 126            | 260             | 385             | 75.5           | 4.4          | 5.8              | 0              | -            | Cisplatin, 5-FU              |
|                                                                      | 16           | Idiopathic             | 53        | 127            | 264             | 407             | 45.5           | 4.3          | 8.5              | 1.2            | -            | -                            |
|                                                                      | 17           | Tuberculosis           | 70        | 118            | 248             | 386             | 122.1          | 2.6          | 1.7              | 3.3            | -            | Iso, Rifa, Eth, Pyr          |
|                                                                      | 18           | Esophageal Ca.         | 66        | 127            | 265             | 436             | 135.3          | 4.4          | 8.3              | 2.4            | -            | Cisplatin, 5-FU              |
|                                                                      | 19           | B-CLL                  | 73        | 121            | 259             | 872             | 82.8           | 2.9          | 7.0              | 1.4            | -            | Flud, Cycloph                |
|                                                                      | 20           | B-NHL                  | 58        | 123            | 256             | 543             | 147.9          | 2.8          | 4.5              | 1.5            | -            | R-CHOP                       |
|                                                                      | 21           | B-NHL                  | 68        | 121            | 256             | 613             | 154.7          | 6.1          | 11.2             | 8.4            | -            | R-CHOEP                      |
|                                                                      | 22           | SCLC                   | 57        | 127            | 264             | 312             | 69.3           | 3.2          | 4.5              | 4.4            | L            | Carbo, Etoposid              |
|                                                                      | 23           | Adeno-BC               | 50        | 121            | 253             | 411             | 79.1           | 1.7          | 2.5              | 2.0            | -            | Cis, Vino.                   |
|                                                                      | 24           | HIV                    | 54        | 117            | 245             | 366             | 128.9          | 2.9          | 5.6              | 3.1            | -            | Zidovudin, LPV/r             |
|                                                                      | 25           | Pancreatic Ca.         | 64        | 128            | 264             | 492             | 125            | 3.2          | 14.6             | 5.6            | L            | 5-FU, Cis, a-INF             |
|                                                                      | 26           | MM                     | 70        | 127            | 266             | 524             | 118            | 4.2          | 12.8             | 8.3            | T            | Bortezomib, DCEP             |
|                                                                      | 27           | MM                     | 49        | 126            | 271             | 422             | 66.6           | 2.2          | 9.6              | 4.4            | -            | Bortezomib                   |
|                                                                      | 28           | NSCLC                  | 74        | 128            | 261             | 581             | 139            | 2.4          | 6.8              | 2.2            | -            | Dauno, Ara-C                 |
|                                                                      | 29           | NSCLC                  | 72        | 125            | 256             | 587             | 131.2          | 2.5          | 3.9              | 2.3            | L            | Cis, Etoposid                |
|                                                                      | 30           | CML                    | 69        | 127            | 262             | 469             | 66.8           | 3.4          | 6.7              | 4.2            | L            | Cis, Etoposid                |
| 31                                                                   | B-CLL        | 67                     | 127       | 259            | 576             | 108.3           | 4.4            | 4.7          | 8.2              | -              | Chlorambucil |                              |
| 32                                                                   | AML          | 42                     | 123       | 255            | 521             | 136.2           | 2.5            | 4.9          | 2.3              | -              | Dauno, Ara-C |                              |
| 33                                                                   | Drug-induced | 75                     | 115       | 245            | 280             | 92.2            | 3.2            | 2.1          | 1.4              | -              | Carb         |                              |
| 34                                                                   | AML          | 56                     | 127       | 264            | 421             | 68.6            | 3.2            | 3.1          | 1.7              | -              | Dauno, Ara-C |                              |
|                                                                      |              | Mean (SD)              | 62 (2)    | 125 (1)        | 259 (1)         | 471 (28)        | 103 (7)        | 3.3 (0.2)    | 7.2 (4)          | 3.3 (2)        |              |                              |
| <b>Low Copeptin Anti-diuresis (Type D, 12%)</b>                      | 35           | NSCLC                  | 66        | 115            | 238             | 497             | 61.5           | 2.3          | 1.9              | 1.0            | -            | Carb, Decetaxel              |
|                                                                      | 36           | AML, MPS               | 46        | 126            | 265             | 296             | 63.5           | 3.1          | 1                | 2              | -            | allo-PBSCT, Eta.             |
|                                                                      | 37           | HIV, HepB,C            | 48        | 125            | 256             | 469             | 126.8          | 3.2          | 0.9              | 1.4            | -            | AZT/3TC/LPV/r                |
|                                                                      | 38           | MM                     | 46        | 126            | 261             | 382             | 98.5           | 2.9          | 1.2              | 0.6            | -            | IEV                          |
|                                                                      | 39           | HIV, tub. men.         | 24        | 128            | 262             | 451             | 91.1           | 3.6          | 1.4              | 1.2            | -            | Ritonavir                    |
|                                                                      | 40           | Drug-induced           | 57        | 129            | 265             | 382             | 73.6           | 4.5          | 1.4              | 0.9            | -            | Quetiapine                   |
|                                                                      |              |                        | Mean (SD) | 48 (5)         | 125 (2)         | 257 (4)         | 463 (56)       | 87 (7)       | 3.1 (0.3)        | 1.3 (0.1)      | 1.1 (0.5)    |                              |

|                                            | Pat. # | Presumed cause of SIAD | Age [yr] | S-Na+ [mmol/l] | S-Osm [mOsm/kg] | U-Osm [mOsm/kg] | U-Na+ [mmol/l] | S-UA [mg/dL] | P-Copt. [pmol/l] | P-AVP [pmol/l] | DIU [L/T/-] | Spec. Treatment/Chemotherapy |
|--------------------------------------------|--------|------------------------|----------|----------------|-----------------|-----------------|----------------|--------------|------------------|----------------|-------------|------------------------------|
| Reverse Copeptin Response<br>(Type E, 20%) | 41     | CML                    | 48       | 117            | 245             | 691             | 66.4           | 3.4          | 50.5             | 14.9           | –           | Imatinib                     |
|                                            | 42     | AML                    | 67       | 111            | 231             | 712             | 88.2           | 2.6          | 42.8             | 10.7           | L           | Cyta, Clofarabin             |
|                                            | 43     | MM                     | 53       | 126            | 259             | 656             | 80.4           | 4.7          | 27.6             | 4.5            | T           | IEV                          |
|                                            | 44     | MM                     | 60       | 129            | 268             | 761             | 261.1          | 4            | 188              | 22.4           | –           | Bortecomib, DCEP             |
|                                            | 45     | NSCLC                  | 70       | 126            | 270             | 765             | 43.9           | 3.1          | 241              | 12.5           | T           | Carb, Decetaxel              |
|                                            | 46     | B-NHL                  | 66       | 129            | 264             | 725             | 138            | 3.1          | 47.8             | 2.6            | –           | R-CHOP, Ritux.               |
|                                            | 47     | MCL                    | 68       | 129            | 264             | 630             | 111.8          | 3.4          | 92.1             | 3.3            | T           | R-CHOP                       |
|                                            | 48     | NSCLC                  | 42       | 125            | 260             | 717             | 75.6           | 3.6          | 100.5            | 8.5            | –           | Palliative Radiatio          |
|                                            | 49     | B-NHL                  | 50       | 129            | 260             | 871             | 96.9           | 3.2          | 28.9             | 4.9            | –           | Ritux, Flud                  |
|                                            | 50     | AML                    | 50       | 125            | 258             | 823             | 119            | 3.7          | 184              | 4.1            | –           | Dauno Ara-C                  |
|                                            |        | Mean (SD)              | 57 (3)   | 125 (2)        | 258 (4)         | 735 (23)        | 108 (19)       | 3.5 (0.2)    | 100.3 (77)       | 8.8 (6)        |             |                              |

AVP, arginine-vasopressin; S-Na+, serum sodium; S-Osm, serum osmolality; U-Osm, urinary osmolality; U-Na+, urinary sodium; S-UA, serum uric acid; S-Crea, serum creatinine; S-Hct, serum hematocrit; P-Renin, plasma renin; P-Aldo, plasma aldosterone; DIU [L/T/-], diuretic use: loops, thiazides, none; n.a., not available.

AML, acute myeloid leukemia; B-NHL, B-cell non-Hodgkin lymphoma; NSCLC, non-small cell lung cancer; SLE, systemic lupus erythematosus; Ca., carcinoma; CML, chronic myeloid leukemia; MM, multiple myeloma; MCL, mantle cell lymphoma; MPS, myeloproliferative syndrome; CLL, chronic lymphatic leukemia; Carba, Carbamazepine; HIV, human immunodeficiency virus infection; SSRI, selective serotonin reuptake inhibitor; tub. men., tuberculous meningitis; SCLC, small-cell lung cancer. Cycloph, Cyclophosphamide; Doxo, Doxorubicin; 5-FU, 5-Fluoruracil; Eto, Etoposid; allo-PBSCT, peripheral blood stem cell transplant; Eta, Etanercept; AZT, Zidovudine; LPV/r, Lopinavir/Ritonavir; 3TC, Lamivudine; Flud, Fludarabine, MTX, Methotrexat; Iso, Isoniazid; Rifa, Rifampicin, Etha, Ethambutol; Pyr, Pyranizamid; R-CHOP, Rituximab/Cyclophosphamid/Hydroxydaunorubicin/Oncovin/Prednisolon; Carbo, Carboplatin; R-CHOEP, R-CHOP plus Etoposid; Cis, Cisplatin; Vino, Vinorelbin; a-IFN, alpha interferon; DCEP, Dexamethasone/Cyclophosphamide/Etoposide/Cisplatin; Dauno, Daunorubicin; Ara-C, Cytarabine; Ritux, Rituximab; IEV, Ifosfamid/Epirubicin/Etoposid; Cyta, Cytarabine.

Data are expressed as mean (SD).

**Table S2. Individual hemodynamic responses to hypertonic saline load in controls and 50 patients with the syndrome of inappropriate antidiuresis.**

|                                       | Subject #          | MAP             |             | HR             |              | U-Na+ Change [%] | B-Volume Change [%] | S-Crea Change [%] | S-UA Change [%] | P-Renin Change [%] | P-Aldosteron Change [%] |
|---------------------------------------|--------------------|-----------------|-------------|----------------|--------------|------------------|---------------------|-------------------|-----------------|--------------------|-------------------------|
|                                       |                    | Baseline [mmHg] | Change [%]  | Baseline [bpm] | Change [%]   |                  |                     |                   |                 |                    |                         |
| Healthy Controls                      | 1                  | 75              | 11          | 62             | 13           | 16               | 13                  | -4                | -9              | -8                 | -19                     |
|                                       | 2                  | 88              | 8           | 56             | 17           | 53               | 16                  | -12               | -9              | 14                 | 4                       |
|                                       | 3                  | 80              | 12          | 66             | 12           | 29               | 21                  | 0                 | -11             | -13                | -22                     |
|                                       | 4                  | 82              | 7           | 72             | 11           | 127              | 18                  | -13               | -8              | -23                | -13                     |
|                                       | 5                  | 78              | 9           | 88             | -11          | 63               | 21                  | 2                 | -7              | -6                 | -65                     |
|                                       | 6                  | 74              | 10          | 64             | 9            | -3               | 18                  | -9                | -13             | -13                | -12                     |
|                                       | 7                  | 82              | -4          | 72             | 17           | 172              | 10                  | -12               | -6              | -4                 | -56                     |
|                                       | 8                  | 86              | -6          | 84             | 5            | 70               | 9                   | -7                | -10             | -2                 | 23                      |
|                                       | 9                  | 88              | 9           | 86             | -2           | 79               | 16                  | 0                 | -4              | 0                  | 0                       |
|                                       | 10                 | 72              | 10          | 74             | 11           | 107              | 19                  | 0                 | -2              | -37                | 0                       |
|                                       | Median (quartiles) | 72 (-12, 82)    | 9 (-4, 10)  | 72 (74, 84)    | 11 (3, 14)   | 67 (26, 112)     | 17 (12, 19)         | -6 (-12, 0)       | -9 (-10, -6)    | -7 (-16, -2)       | -13 (-31, 1)            |
| Ectopic Copeptin Excess (Type A, 10%) | 1                  | 85              | 9           | 72             | -6           | 39               | 5                   | 0                 | -7              | 6                  | 0                       |
|                                       | 2                  | 72              | 22          | 84             | -19          | 6                | 3                   | 0                 | -3              | -40                | 0                       |
|                                       | 3                  | 93              | -11         | 66             | 18           | 16               | 8                   | -9                | -7              | -39                | -32                     |
|                                       | 4                  | 88              | 10          | 80             | -10          | 56               | 6                   | 0                 | -3              | -41                | -50                     |
|                                       | 5                  | 92              | 12          | 70             | 26           | 48               | 1                   | -14               | 6               | -43                | -38                     |
|                                       | Median (quartiles) | 88 (79, 93)     | 10 (-1, 17) | 72 (68, 82)    | -6 (-15, 22) | 39 (11, 52)      | 5* (2, 7)           | 0 (-12, 0)        | -3 (-7, 7)      | -40 (-42, -17)     | -32 (-44, 0)            |

|                                                        | Subject     | MAP             |            | HR             |            | U-Na+      | B-Volume   | S-Crea     | S-UA       | P-Renin    | P-Aldosteron |
|--------------------------------------------------------|-------------|-----------------|------------|----------------|------------|------------|------------|------------|------------|------------|--------------|
|                                                        | #           | Baseline [mmHg] | Change [%] | Baseline [bpm] | Change [%]   |
| <b>Shifted Osmotic Copeptin Response (Type B, 14%)</b> | 6           | 92              | -10        | 65             | 17         | 1          | 4          | 17         | -11        | -65        | -46          |
|                                                        | 7           | 64              | 44         | 95             | -22        | 11         | 3          | -25        | -5         | -48        | -22          |
|                                                        | 8           | 79              | -15        | 70             | 20         | 52         | 6          | 0          | -6         | -13        | -7           |
|                                                        | 9           | 83              | 10         | 78             | 18         | 24         | 3          | 17         | -44        | -7         | -6           |
|                                                        | 10          | 76              | 17         | 76             | -16        | 25         | 8          | 0          | -10        | -68        | -30          |
|                                                        | 11          | 90              | -8         | 72             | 11         | 21         | 5          | 18         | -2         | -11        | -15          |
|                                                        | 12          | 88              | 9          | 82             | -20        | 35         | 4          | -9         | -7         | -41        | -22          |
|                                                        | Median      | 83*             | 9          | 76             | 11         | 24*        | 4*         | 0          | -7         | -41*       | -22          |
|                                                        | (quartiles) | (76, 90)        | (-10, 17)  | (70, 82)       | (-20, 20)  | (11, 35)   | (3, 6)     | (-9, 18)   | (-11, -2)  | (-65, -7)  | (-30, -6)    |

|                                                                  | Subject     | MAP             |            | HR             |            | U-Na+      | B-Volume   | S-Crea     | S-UA       | P-Renin    | P-Aldosteron |
|------------------------------------------------------------------|-------------|-----------------|------------|----------------|------------|------------|------------|------------|------------|------------|--------------|
|                                                                  | #           | Baseline [mmHg] | Change [%] | Baseline [bpm] | Change [%]   |
| Plateau-like/ missing osmotic Copeptin response<br>(Type C, 44%) | 13          | 91              | -4         | 72             | 17         | 9          | 8          | 0          | -5         | 0          | 0            |
|                                                                  | 14          | 79              | -13        | 64             | 13         | -3         | 6          | -14        | 0          | -27        | -48          |
|                                                                  | 15          | 85              | 9          | 66             | 12         | 32         | 9          | 33         | -5         | n.a.       | -7           |
|                                                                  | 16          | 94              | -6         | 106            | 15         | 92         | 7          | -13        | n.a.       | -14        | 0            |
|                                                                  | 17          | 72              | 11         | 84             | 10         | 43         | 9          | -40        | 4          | -26        | -50          |
|                                                                  | 18          | 76              | 11         | 92             | -4         | 8          | 5          | 0          | 2          | -33        | -63          |
|                                                                  | 19          | 92              | 7          | 60             | 17         | 7          | 7          | 0          | -14        | -8         | -18          |
|                                                                  | 20          | 96              | 17         | 76             | 21         | -8         | 4          | -14        | -7         | -6         | 0            |
|                                                                  | 21          | 88              | -7         | 72             | 19         | 6          | 11         | 0          | 16         | n.a.       | n.a.         |
|                                                                  | 22          | 92              | -10        | 88             | 7          | 9          | 2          | 0          | -13        | -8         | -9           |
|                                                                  | 23          | 77              | 12         | 91             | -6         | 20         | 8          | 0          | 6          | -26        | -7           |
|                                                                  | 24          | 72              | 17         | 60             | 17         | 30         | 10         | 0          | 7          | -4         | -12          |
|                                                                  | 25          | 88              | 11         | 88             | 9          | 9          | 17         | 0          | -13        | -14        | -17          |
|                                                                  | 26          | 100             | 7          | 64             | 13         | -3         | 7          | 0          | -5         | -7         | -12          |
|                                                                  | 27          | 94              | 4          | 72             | 22         | 11         | 4          | 0          | -32        | -          | n.a.         |
|                                                                  | 28          | 88              | -2         | 76             | 11         | 26         | 10         | -20        | -21        | -7         | 0            |
|                                                                  | 29          | 94              | 6          | 68             | 6          | 29         | 4          | -33        | -24        | -14        | 0            |
|                                                                  | 30          | 92              | 7          | 66             | 15         | -2         | 14         | -14        | -3         | -10        | -15          |
|                                                                  | 31          | 75              | -7         | 84             | -14        | 66         | 2          | -13        | 52         | -2         | -1           |
|                                                                  | 32          | 86              | 13         | 82             | -10        | 34         | 15         | 0          | 28         | -4         | 0            |
|                                                                  | 33          | 92              | 9          | 76             | 5          | 12         | 6          | -22        | -6         | n.a.       | -27          |
|                                                                  | 34          | 64              | 31         | 95             | -22        | 10         | 15         | 0          | 0          | -10        | -11          |
|                                                                  | Median      | 88**            | 7          | 76             | 11         | 11**       | 7.5*       | 0          | -4         | -9         | -10          |
|                                                                  | (quartiles) | (77, 93)        | (-5, 12)   | (66, 88)       | (3, 17)    | (7, 31)    | (5, 10)    | (-13, 0)   | (-13, 5)   | (-17, -6)  | (-17, 0)     |

|                                          | Subject            | MAP             |              | HR             |             | U-Na+         | B-Volume   | S-Crea     | S-UA         | P-Renin      | P-Aldosteron  |
|------------------------------------------|--------------------|-----------------|--------------|----------------|-------------|---------------|------------|------------|--------------|--------------|---------------|
|                                          | #                  | Baseline [mmHg] | Change [%]   | Baseline [bpm] | Change [%]  | Change [%]    | Change [%] | Change [%] | Change [%]   | Change [%]   | Change [%]    |
| Low Copeptin anti-diuresis (Type D, 12%) | 35                 | 90              | -7           | 62             | 16          | 6             | 1          | 0          | 13           | -12          | -8            |
|                                          | 36                 | 100             | 12           | 84             | 10          | 9             | 11         | 0          | -13          | -43          | -92           |
|                                          | 37                 | 88              | -18          | 76             | 16          | 12            | 7          | -17        | 3            | -26          | -39           |
|                                          | 38                 | 101             | 11           | 82             | 17          | 2             | 18         | 0          | 7            | 16           | 0             |
|                                          | 39                 | 94              | -17          | 66             | 27          | 16            | 7          | 25         | 3            | 7            | -17           |
|                                          | 40                 | 88              | 7            | 76             | 16          | 43            | 15         | -8         | -16          | -27          | -80           |
|                                          | Median (quartiles) | 90** (88, 100)  | 7 (-17, 11)  | 76 (66, 82)    | 16 (10, 17) | 12* (6, 16)   | 7* (6, 15) | 0 (-8, 0)  | 3 (-13, 7)   | -26 (-32, 7) | -39 (-80, -8) |
| Reverse Copeptin Response (Type E, 20%)  | 41                 | 91              | -9           | 62             | 16          | 8             | 6          | 0          | -18          | -34          | -12           |
|                                          | 42                 | 86              | 19           | 74             | 19          | 1             | 4          | -12.5      | -4           | -25          | -19           |
|                                          | 43                 | 94              | -13          | 72             | 15          | -14           | 5          | -20        | -55          | -31          | -31           |
|                                          | 44                 | 92              | 7            | 62             | 19          | -11           | 2          | 0          | -3           | n.a.         | 0             |
|                                          | 45                 | 76              | -8           | 72             | 17          | -20           | 1          | 0          | -7           | -22          | -35           |
|                                          | 46                 | 66              | 17           | 76             | 17          | -3            | 2          | 0          | -7           | -4           | -19           |
|                                          | 47                 | 82              | 15           | 66             | 18          | -21           | 8          | 25         | -6           | 13           | 0             |
|                                          | 48                 | 100             | 8            | 70             | 23          | 5             | 6          | -10        | -8           | 17           | -12           |
|                                          | 49                 | 79              | -15          | 72             | 17          | 32            | 3          | 0          | -3           | -6           | 0             |
|                                          | 50                 | 91              | -9           | 68             | 14          | -20           | 4          | -14        | 3            | 49           | -15           |
|                                          | Median (quartiles) | 89** (78, 93)   | -1 (-10, 15) | 71 (65, 73)    | 17 (16, 19) | -7** (-20, 6) | 4* (2, 6)  | 0 (-13, 0) | -6 (-11, -3) | -6 (-28, 15) | -13 (-22, 0)  |

MAP, mean arterial pressure; HR, heart rate; U-Na+, urinary sodium; B-Vol, percent change in blood volume calculated by the method described in the text; S-Crea, serum creatinine; S-UA, serum uric acid; P-Ren, plasma renin; P-Aldo, plasma aldosterone; n.a., not available. Data are expressed as median (quartiles).

\*  $P < 0.05$ , \*\*  $P < 0.01$  for comparison of the respective SIAD subgroup with the healthy control group (Mann-Whitney U-test).
